# Supplementary material for: Molecular design and functional outcomes of RTP and TADF traits in isomers
Source: Royal Society of Chemistry journal article supplement (doi:10.1039/d4ra05807k), 2024-01-01
Supplement: d4ra05807k1.pdf [file d4ra05807k1.pdf]

## CONTENTS

- 1. Structural Characterization Information**
- 2. Supporting Figures**
- 3. Supporting Tables**

## 1. Structural Characterization Information

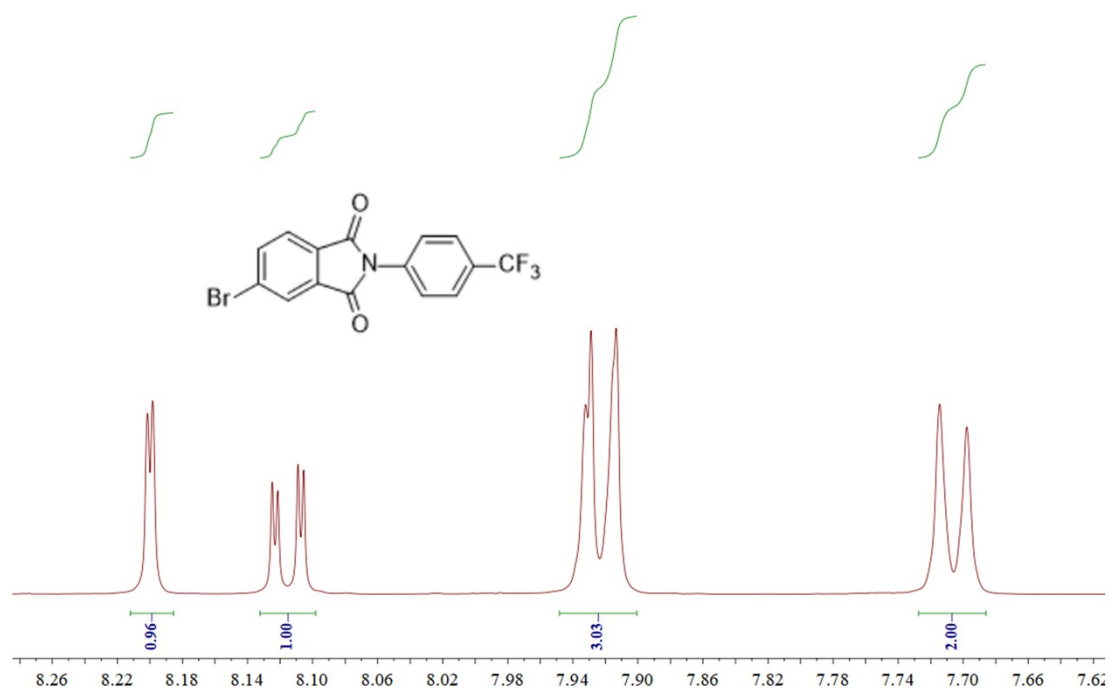

Figure S1. The <sup>1</sup>H NMR spectrum of 3FmBr in DMSO-d<sub>6</sub>.

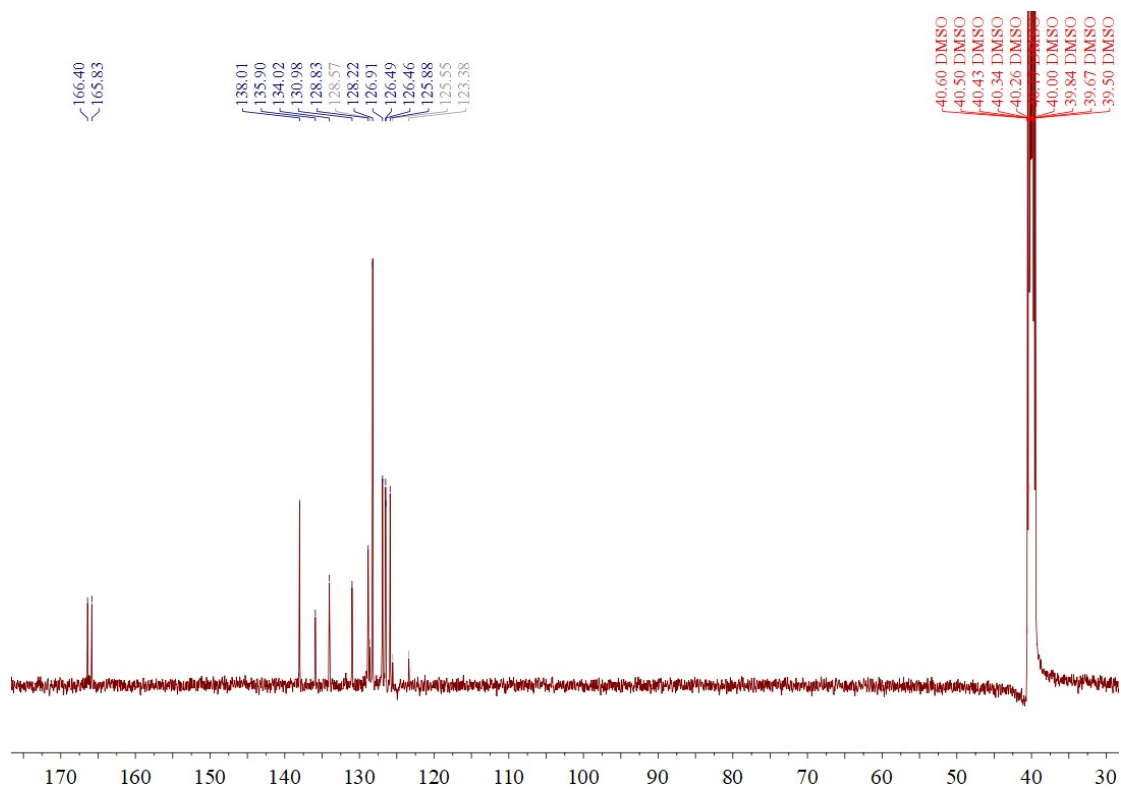

Figure S2. The <sup>13</sup>C NMR spectrum of 3FmBr in DMSO-d<sub>6</sub>.

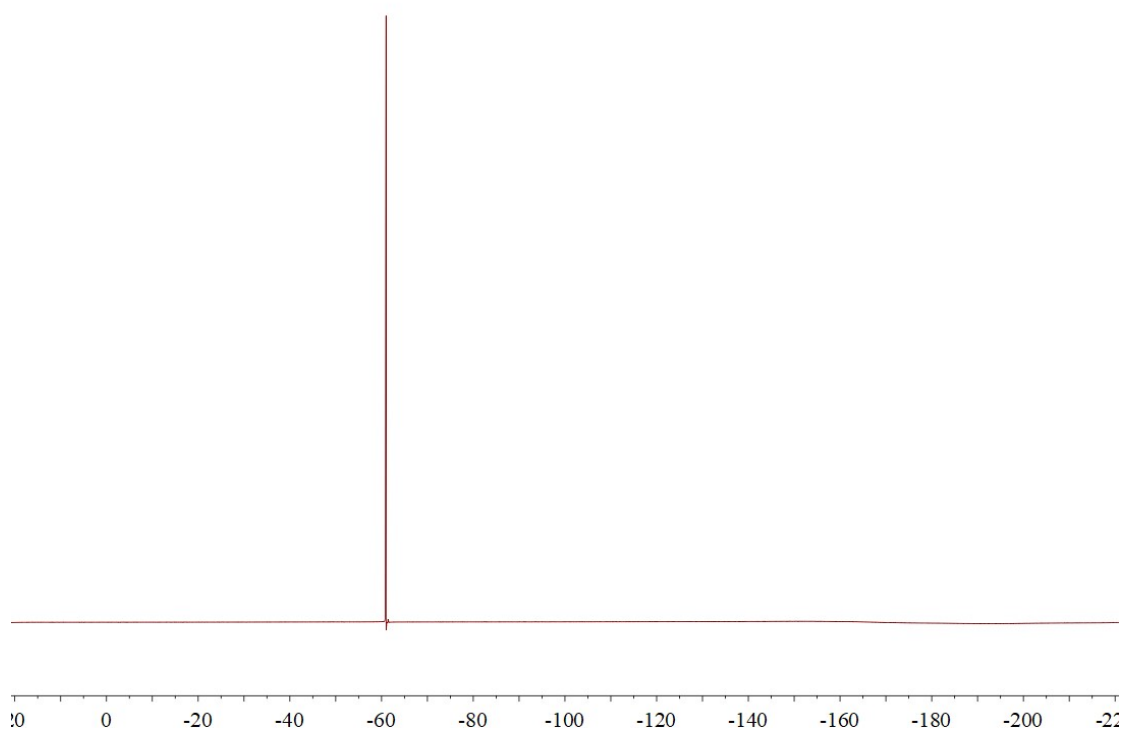

**Figure S3.** The  $^{19}\text{F}$  NMR spectrum of 3FmBr in  $\text{DMSO-d}_6$ .

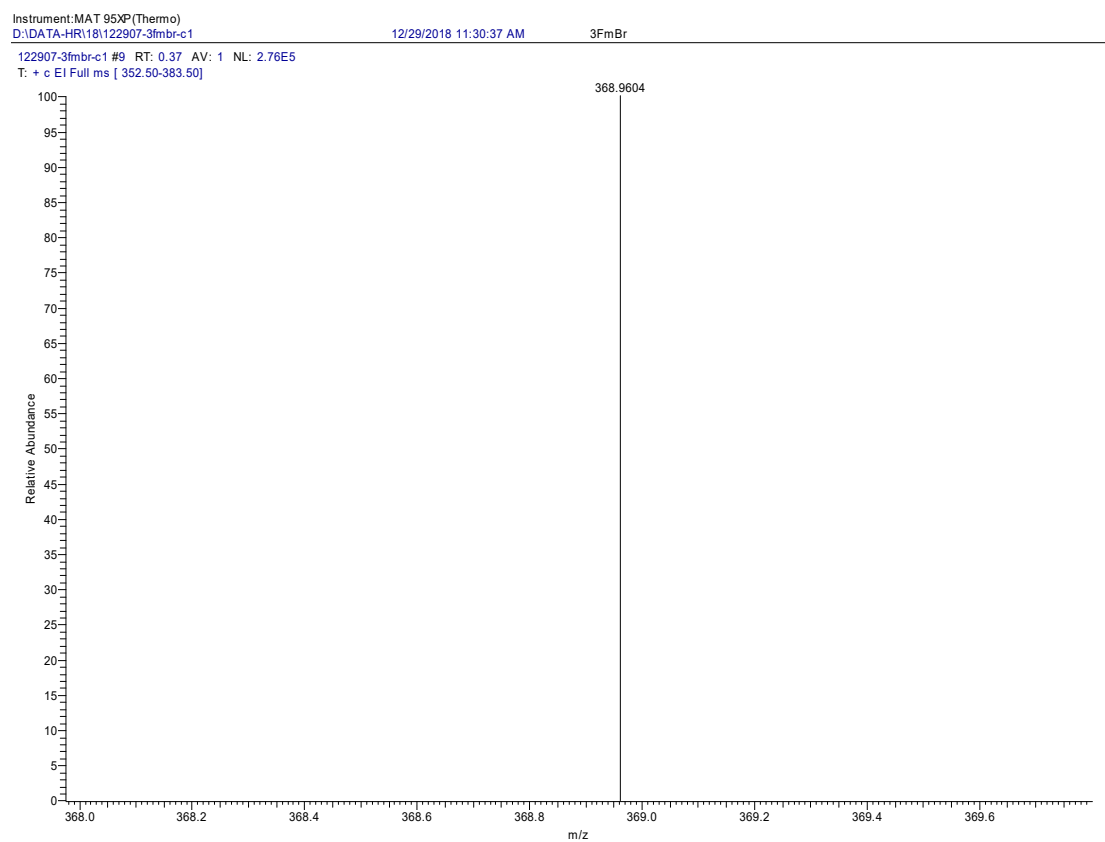

**Figure S4.** The high resolution mass spectra of 3FmBr.

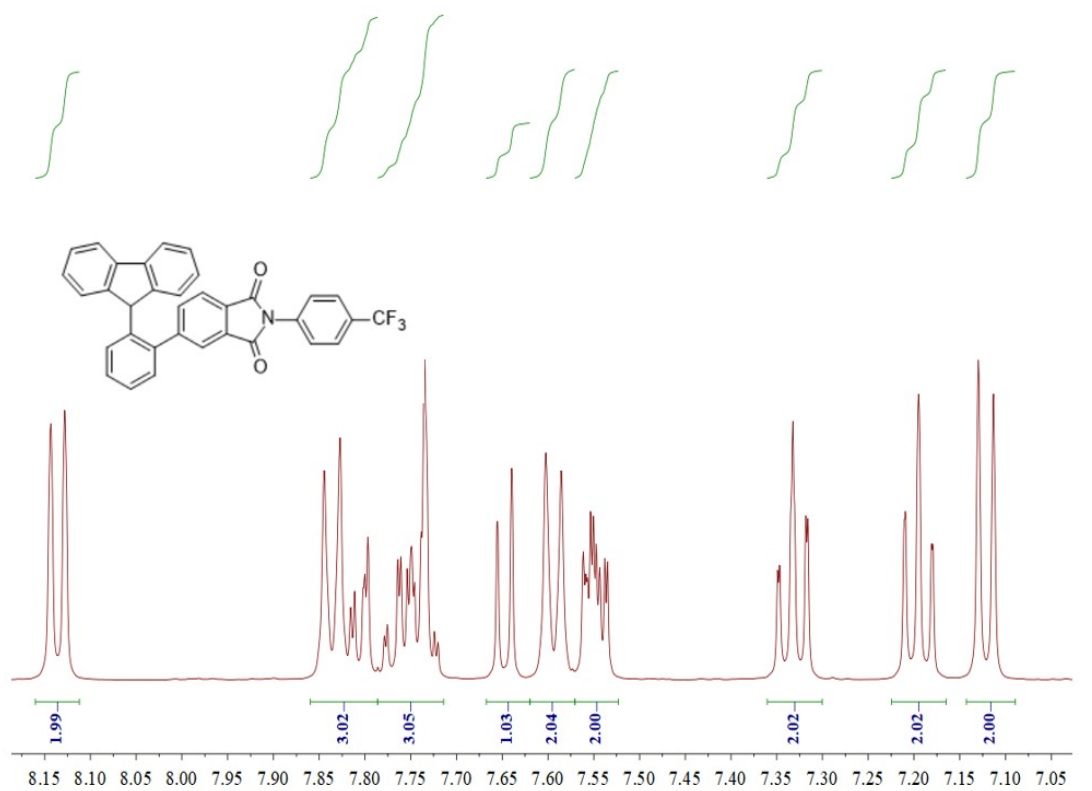

**Figure S5.** The <sup>1</sup>H NMR spectrum of 3Fmo in DMSO-d<sub>6</sub>.

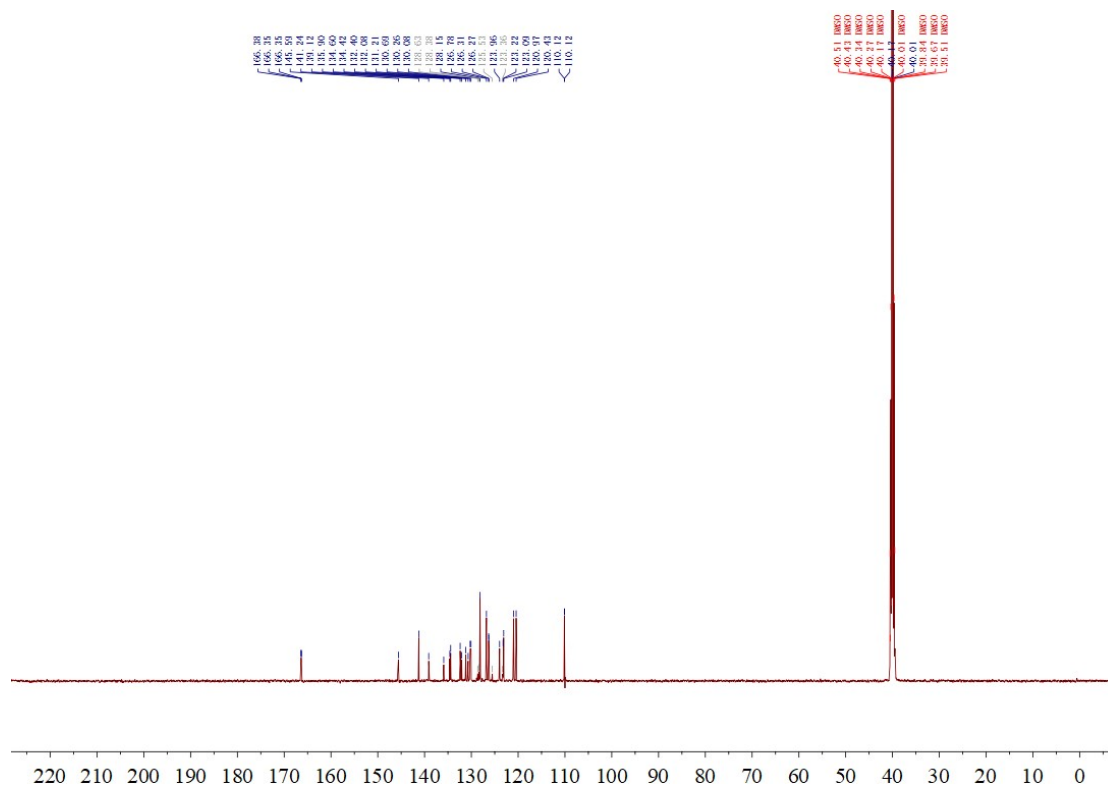

**Figure S6.** The <sup>13</sup>C NMR spectrum of 3Fmo in DMSO-d<sub>6</sub>.

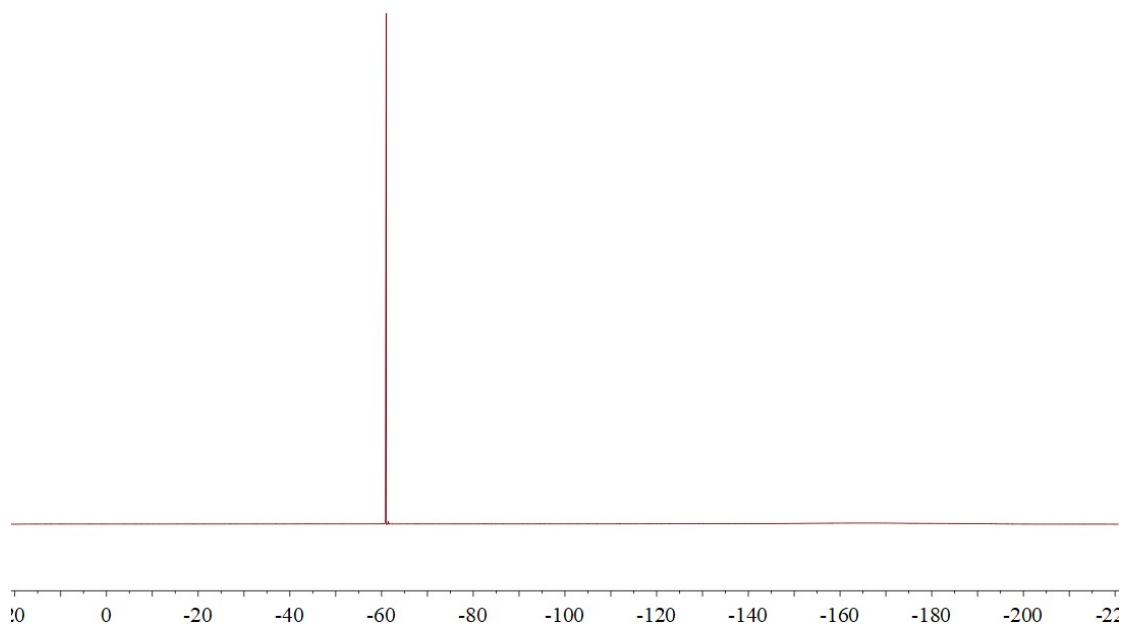

**Figure S7.** The  $^{19}\text{F}$  NMR spectrum of 3Fmo in  $\text{DMSO-d}_6$ .

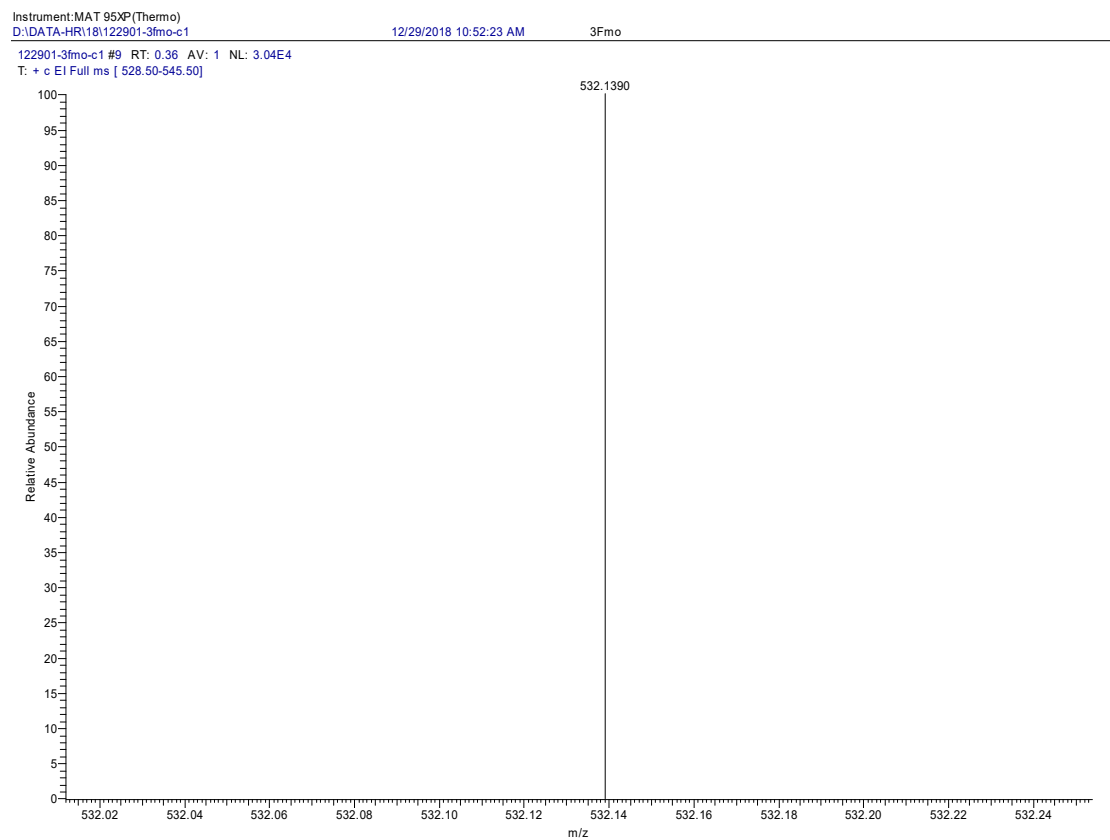

**Figure S8.** The high resolution mass spectra of 3Fmo.

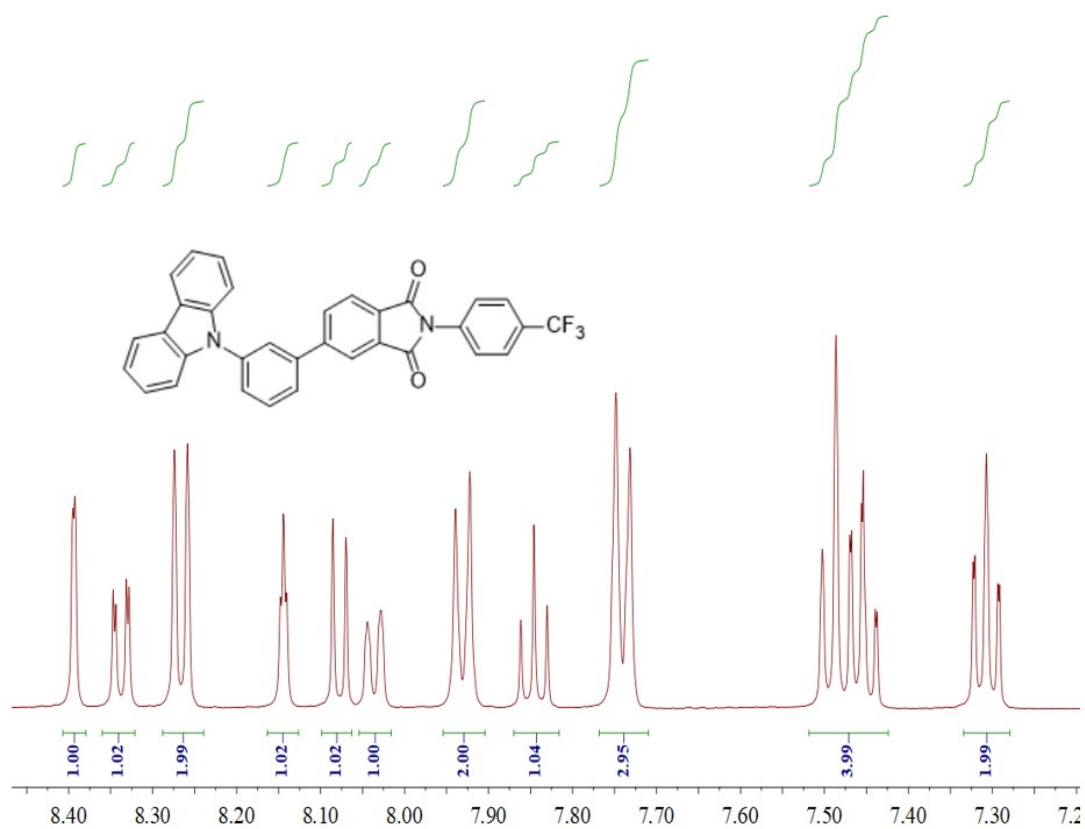

**Figure S9.** The  $^1\text{H}$  NMR spectrum of 3Fmm in  $\text{DMSO-d}_6$ .

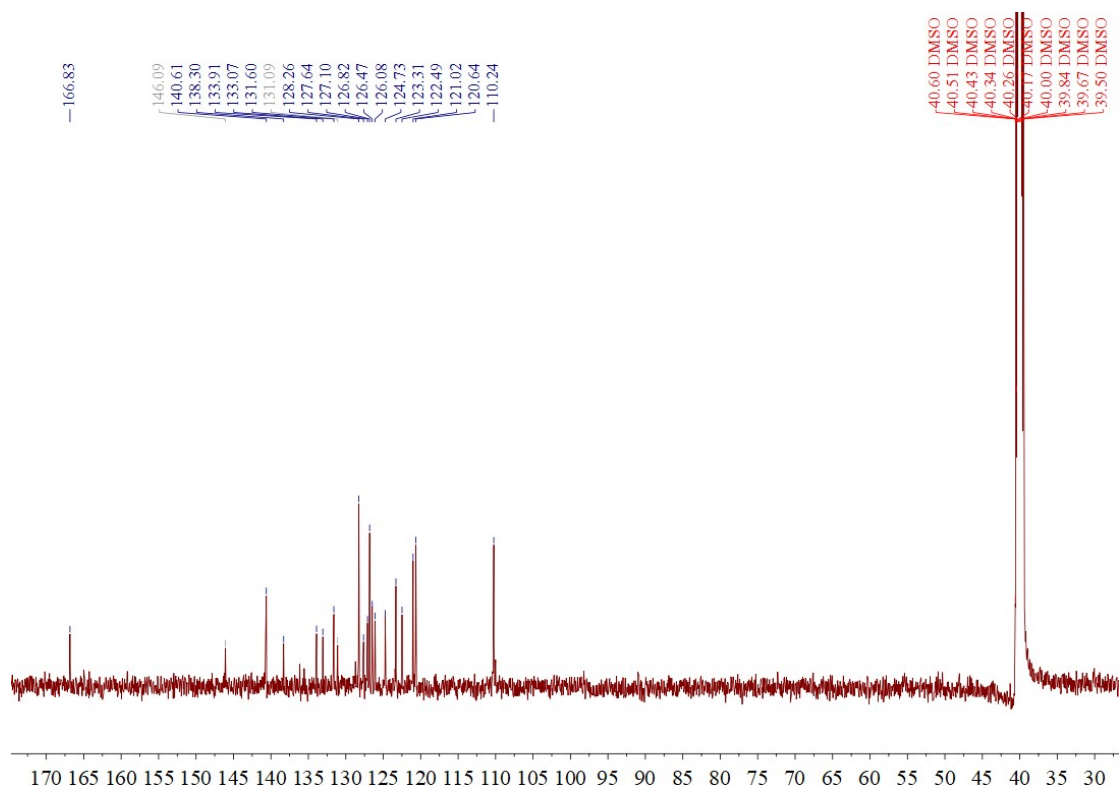

**Figure S10.** The  $^{13}\text{C}$  NMR spectrum of 3Fmm in  $\text{DMSO-d}_6$ .

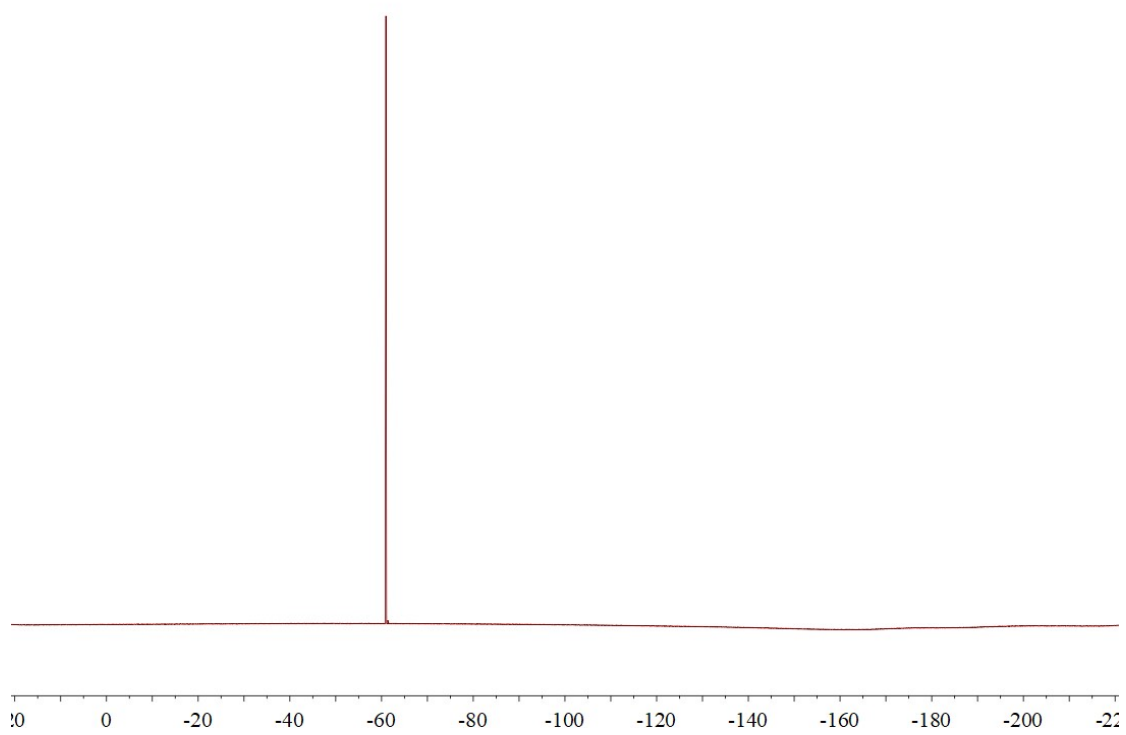

Figure S11. The  $^{19}\text{F}$  NMR spectrum of 3Fmm in  $\text{DMSO-d}_6$ .

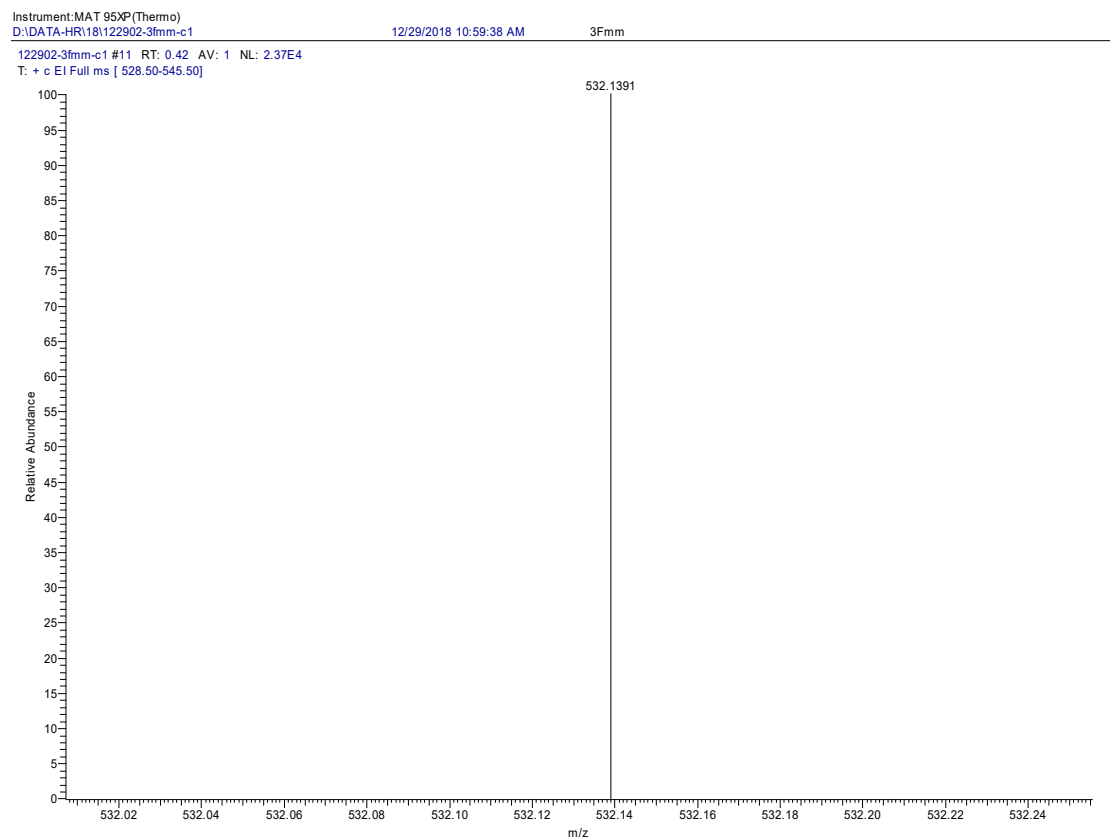

Figure S12. The high resolution mass spectra of 3Fmm.

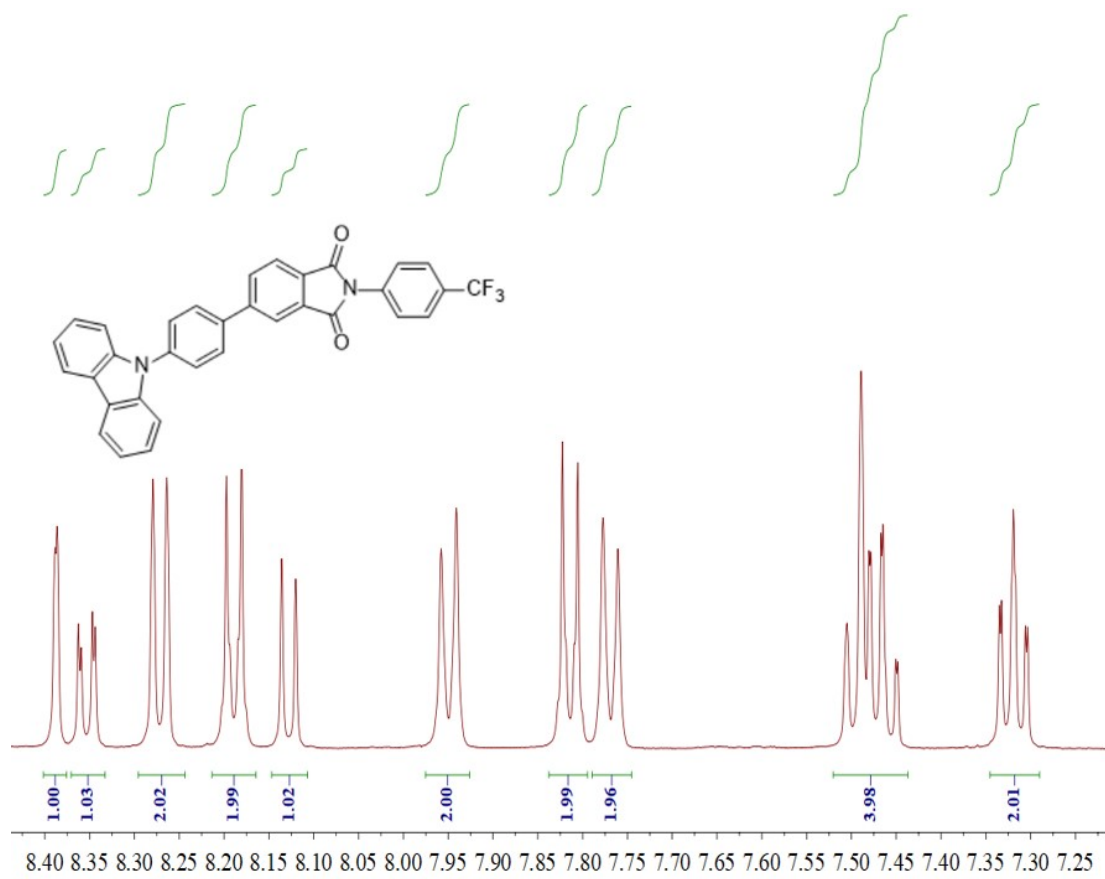

Figure S13. The <sup>1</sup>H NMR spectrum of 3Fmp in DMSO-d<sub>6</sub>.

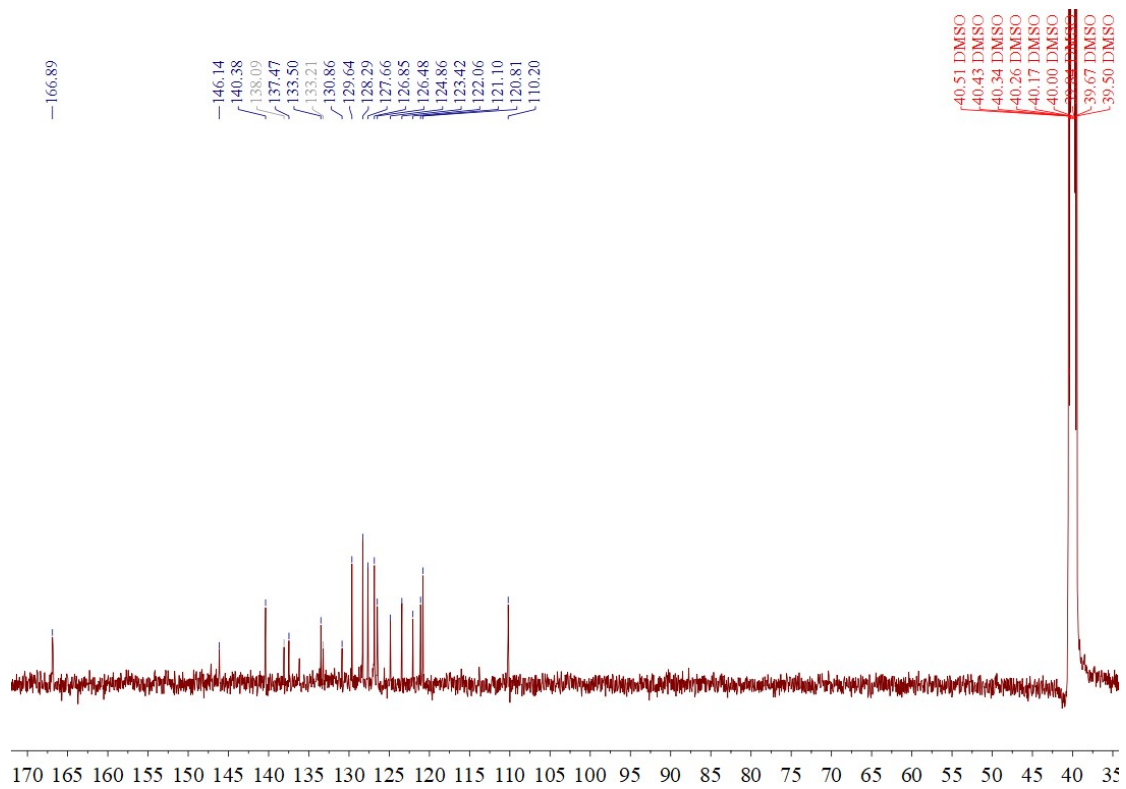

Figure S14. The <sup>13</sup>C NMR spectrum of 3Fmp in DMSO-d<sub>6</sub>.



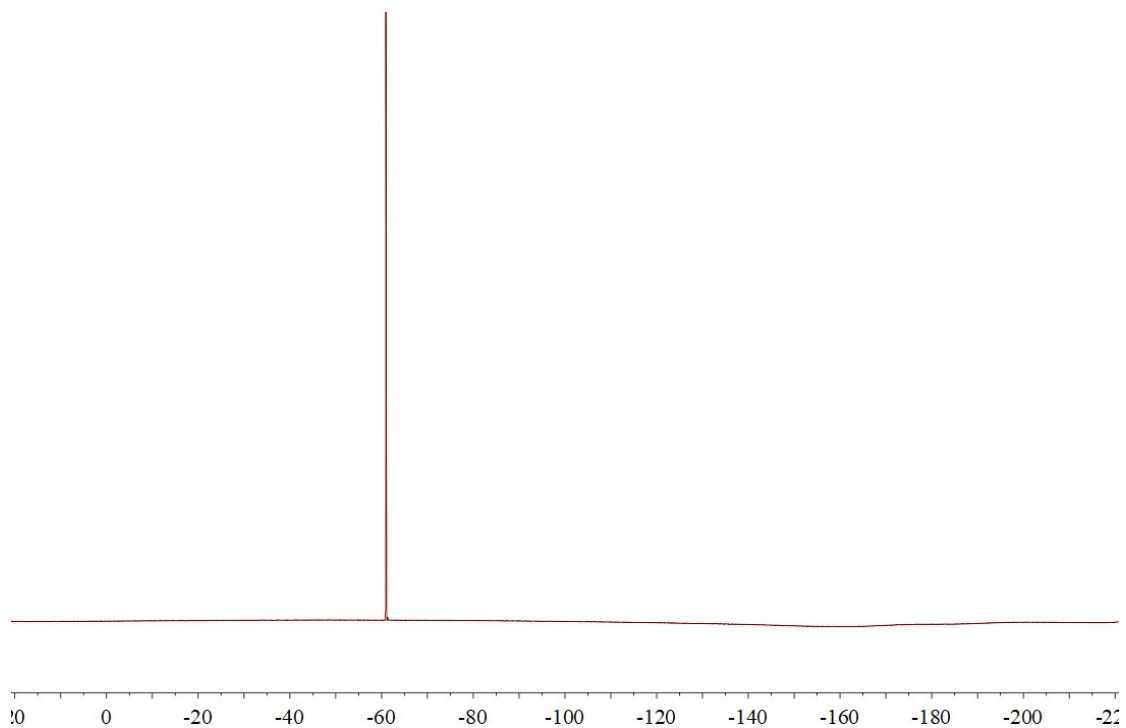

**Figure S15.** The  $^{19}\text{F}$  NMR spectrum of 3Fmp in  $\text{DMSO-d}_6$ .

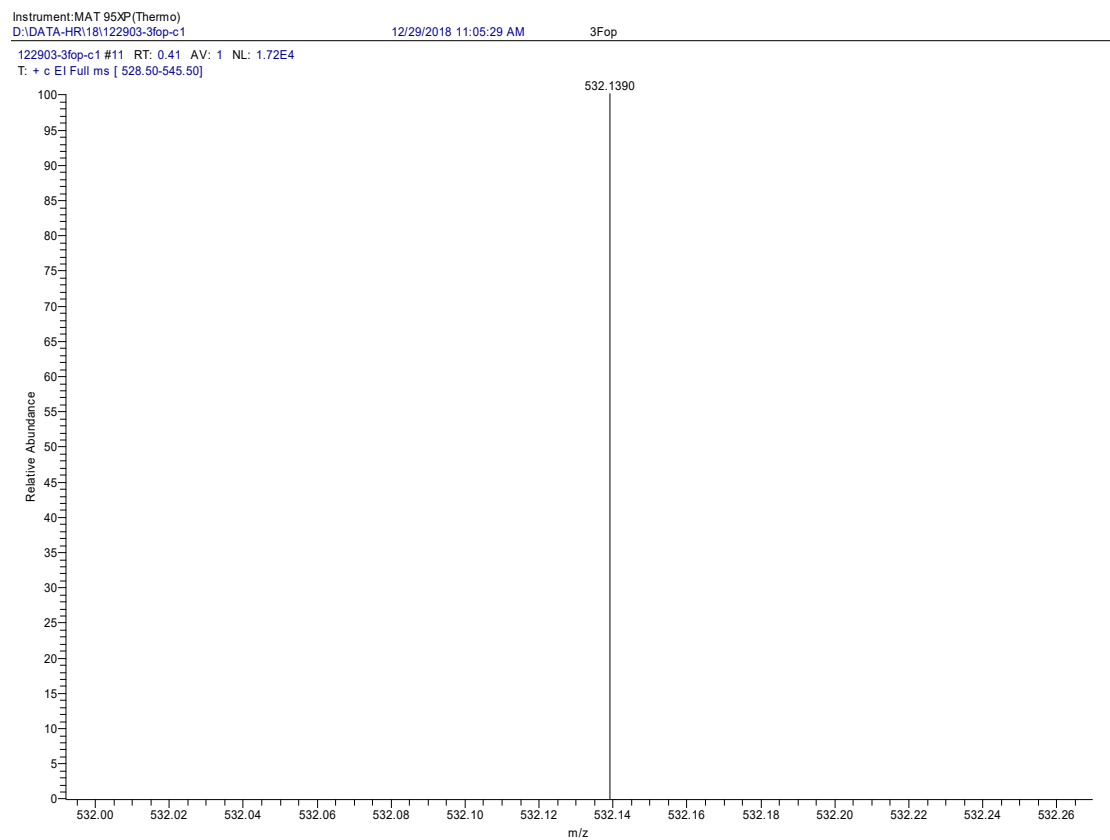

**Figure S16.** The high resolution mass spectra of 3Fmps.

## 2. Supporting Figures

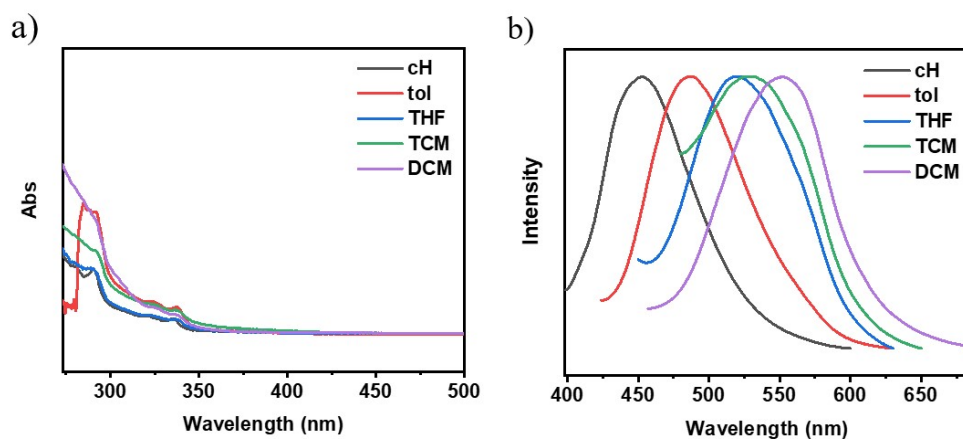

**Figure S17.** The UV-visible absorption spectrum (a) and fluorescence spectrum (b) of 3Fmo in dilute solutions ( $c=10^{-5}$  M) of varying polarity.

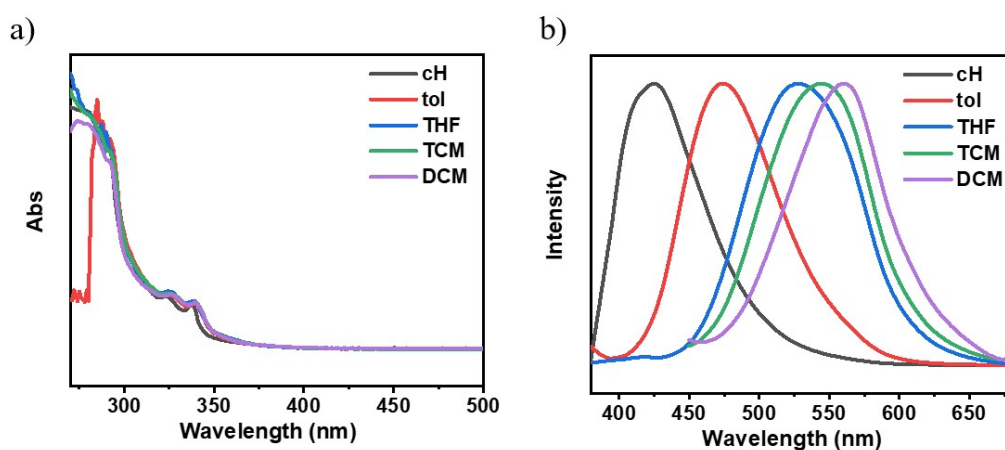

**Figure S18.** The UV-visible absorption spectrum (a) and fluorescence spectrum (b) of 3Fmm in dilute solutions ( $c=10^{-5}$  M) of varying polarity.

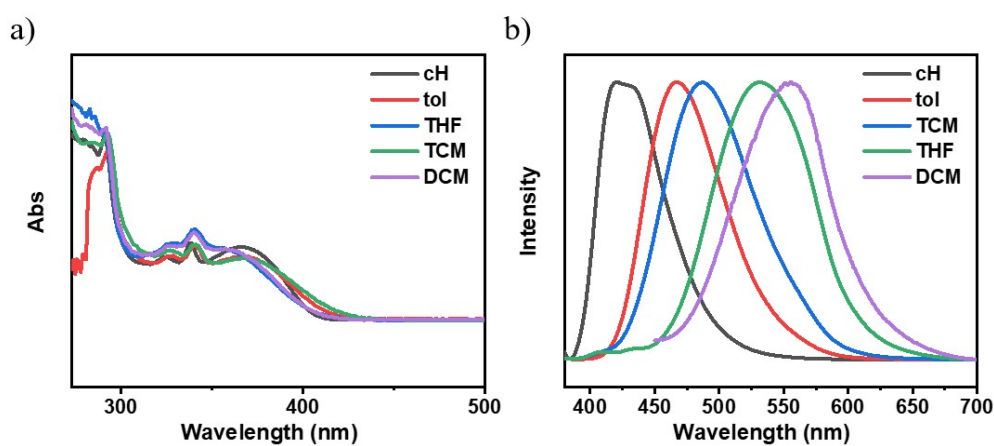

**Figure S19.** The UV-visible absorption spectrum (a) and fluorescence spectrum (b) of 3Fmp in dilute solutions ( $c=10^{-5}$  M) of varying polarity.

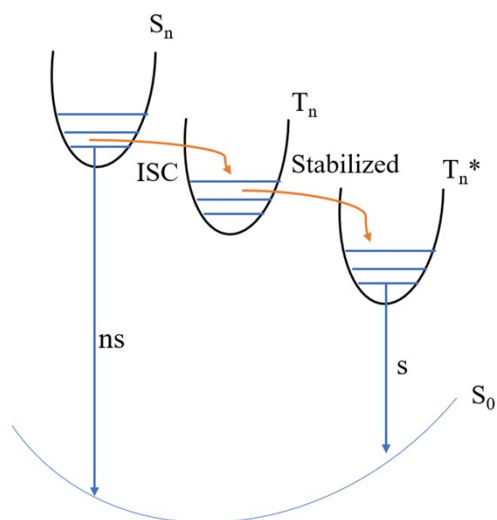

**Figure S20.** Schematic diagram of the multi-molecular phosphorescence emission process.

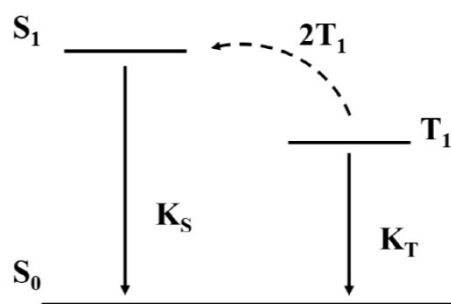

**Figure S21.** Schematic diagram of the TTA emission mechanism.

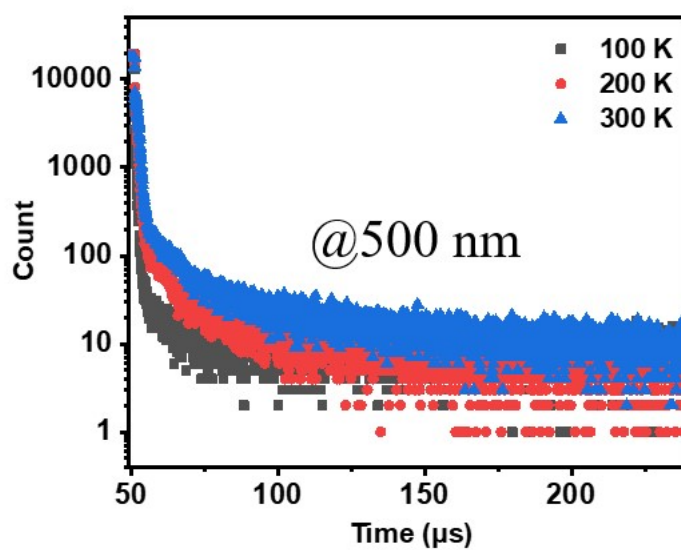

**Figure S22.** Temperature-dependent lifetimes of the excited state associated with the 500 nm emission peak in 3Fmo powder.

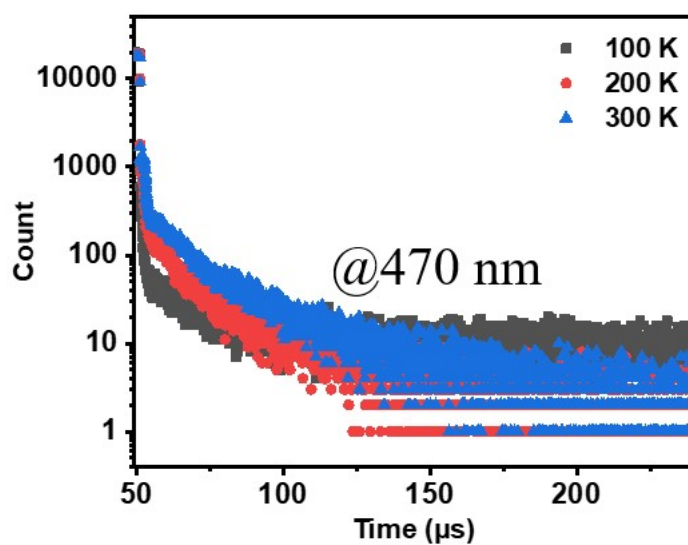

**Figure S23.** Temperature-dependent lifetimes of the excited state associated with the 470 nm emission peak in 3Fmp powder.

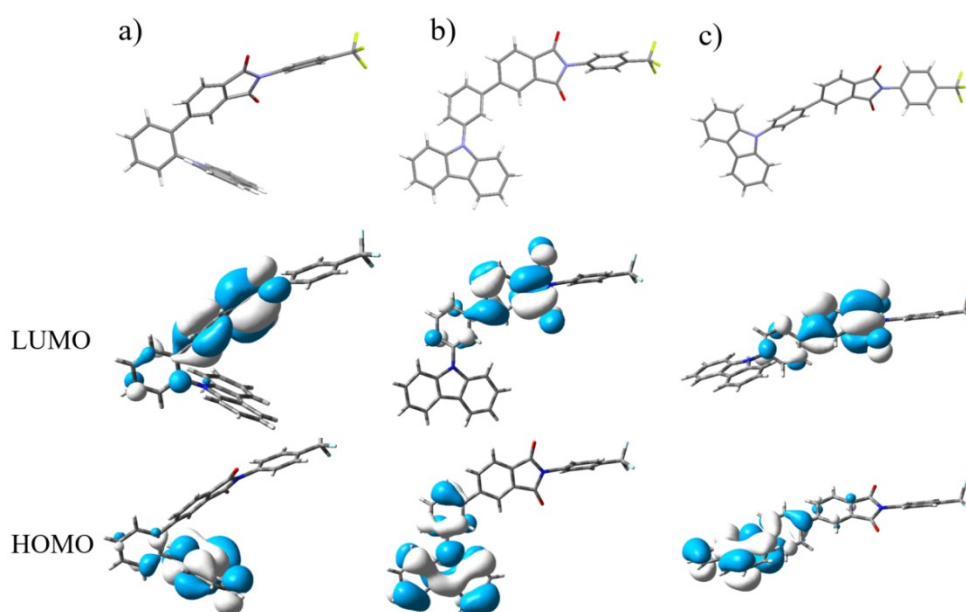

**Figure S24.** The single-crystal structures and distributions of electron density for the compounds are identified as: a) 3Fmo; b) 3Fmm; c) 3Fmp.

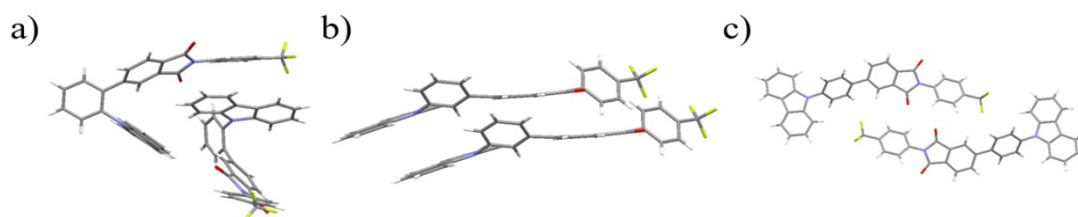

**Figure S25.** Interaction of molecules in the crystal: a) 3Fmo; b) 3Fmm; c) 3Fmp.

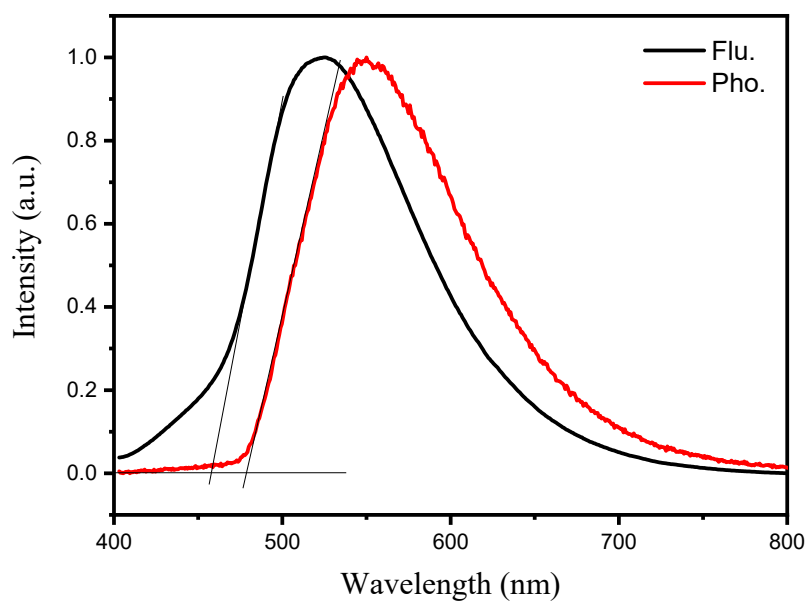

**Figure S26.** The fluorescence and phosphorescence spectra of 3Fmo.

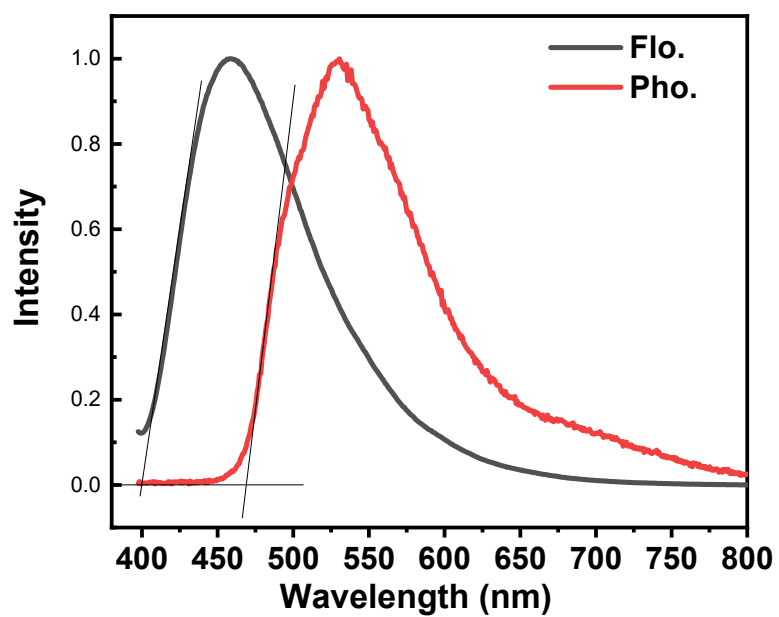

**Figure S27.** The fluorescence and phosphorescence spectra of 3Fmm.

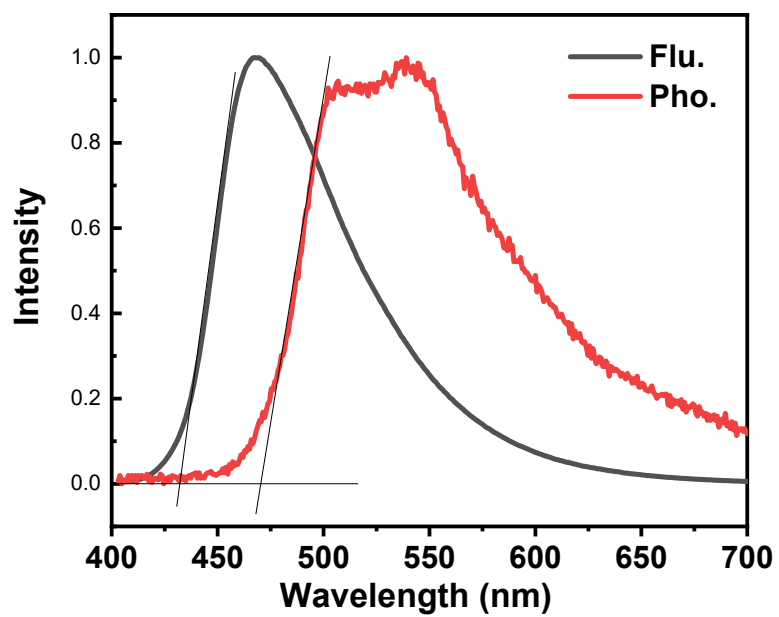

**Figure S28.** The fluorescence and phosphorescence spectra of 3Fmp.

### 3. Supporting Tables

**Table S1.** Photophysical properties of the compound powder

|                            | <b>3Fmo</b> | <b>3Fmm</b> | <b>3Fmp</b> |
|----------------------------|-------------|-------------|-------------|
| $\lambda_{max}^{em}$ (nm)  | 494         | 456         | 468         |
| $\lambda_{max}^{abs}$ (nm) | 429         | 378         | 421         |
| $\lambda_{max}^{ex}$ (nm)  | 486         | 385         | 454         |
| $\tau$ ( $\mu$ s)          | 2.25        | 59.6        | 11.7        |

**Table S2.** Crystal data and structure refinement for 3Fmo

| <b>Identification code</b>                              | <b>3Fmo</b>                                                                  |
|---------------------------------------------------------|------------------------------------------------------------------------------|
| <b>Empirical formula</b>                                | C <sub>33</sub> H <sub>19</sub> F <sub>3</sub> N <sub>2</sub> O <sub>2</sub> |
| <b>Formula weight</b>                                   | 532.50                                                                       |
| <b>Temperature/K</b>                                    | 292.9(3)                                                                     |
| <b>Crystal system</b>                                   | monoclinic                                                                   |
| <b>Space group</b>                                      | P2 <sub>1</sub> /n                                                           |
| <b>a/Å</b>                                              | 14.1951(3)                                                                   |
| <b>b/Å</b>                                              | 10.5832(2)                                                                   |
| <b>c/Å</b>                                              | 17.5467(3)                                                                   |
| <b><math>\alpha</math>/°</b>                            | 90                                                                           |
| <b><math>\beta</math>/°</b>                             | 98.318(2)                                                                    |
| <b><math>\gamma</math>/°</b>                            | 90                                                                           |
| <b>Volume/Å<sup>3</sup></b>                             | 2608.30(9)                                                                   |
| <b>Z</b>                                                | 4                                                                            |
| <b><math>\rho_{calc}</math>/cm<sup>3</sup></b>          | 1.356                                                                        |
| <b><math>\mu</math>/mm<sup>-1</sup></b>                 | 0.832                                                                        |
| <b>F(000)</b>                                           | 1096.0                                                                       |
| <b>Crystal size/mm<sup>3</sup></b>                      | 0.400 × 0.300 × 0.060                                                        |
| <b>Radiation</b>                                        | CuK $\alpha$ ( $\lambda$ = 1.54184)                                          |
| <b>2<math>\theta</math> range for data collection/°</b> | 7.502 to 149.844                                                             |
| <b>Index ranges</b>                                     | -14 ≤ h ≤ 17, -12 ≤ k ≤ 8, -19 ≤ l ≤ 21                                      |
| <b>Reflections collected</b>                            | 8076                                                                         |
| <b>Independent reflections</b>                          | 5132 [R <sub>int</sub> = 0.0251, R <sub>sigma</sub> = 0.0339]                |
| <b>Data/restraints/parameters</b>                       | 5132/0/361                                                                   |
| <b>Goodness-of-fit on F<sup>2</sup></b>                 | 1.048                                                                        |
| <b>Final R indexes [I ≥ 2<math>\sigma</math> (I)]</b>   | R <sub>1</sub> = 0.0643, wR <sub>2</sub> = 0.1798                            |

|                                                   |                                  |
|---------------------------------------------------|----------------------------------|
| <b>Final R indexes [all data]</b>                 | $R_1 = 0.0772$ , $wR_2 = 0.1967$ |
| <b>Largest diff. peak/hole / e Å<sup>-3</sup></b> | 0.58/-0.42                       |

**Table S3.** Crystal data and structure refinement for 3Fmm.

| <b>Identification code</b>                                                | <b>3Fmm</b>                                                      |
|---------------------------------------------------------------------------|------------------------------------------------------------------|
| <b>Empirical formula</b>                                                  | $C_{33}H_{19}F_3N_2O_2$                                          |
| <b>Formula weight</b>                                                     | 532.50                                                           |
| <b>Temperature/K</b>                                                      | 150.00(10)                                                       |
| <b>Crystal system</b>                                                     | monoclinic                                                       |
| <b>Space group</b>                                                        | $P2_1/c$                                                         |
| <b>a/Å</b>                                                                | 26.4492(10)                                                      |
| <b>b/Å</b>                                                                | 16.7231(6)                                                       |
| <b>c/Å</b>                                                                | 5.3699(2)                                                        |
| <b><math>\alpha/^\circ</math></b>                                         | 90                                                               |
| <b><math>\beta/^\circ</math></b>                                          | 94.146(4)                                                        |
| <b><math>\gamma/^\circ</math></b>                                         | 90                                                               |
| <b>Volume/Å<sup>3</sup></b>                                               | 2368.96(15)                                                      |
| <b>Z</b>                                                                  | 4                                                                |
| <b><math>\rho_{\text{calc}}/\text{cm}^3</math></b>                        | 1.493                                                            |
| <b><math>\mu/\text{mm}^{-1}</math></b>                                    | 0.916                                                            |
| <b>F(000)</b>                                                             | 1096.0                                                           |
| <b>Crystal size/mm<sup>3</sup></b>                                        | ? × ? × ?                                                        |
| <b>Radiation</b>                                                          | CuK $\alpha$ ( $\lambda = 1.54184$ )                             |
| <b>2<math>\theta</math> range for data collection/<math>^\circ</math></b> | 17.386 to 148.082                                                |
| <b>Index ranges</b>                                                       | $-32 \leq h \leq 27$ , $-17 \leq k \leq 20$ , $-4 \leq l \leq 6$ |
| <b>Reflections collected</b>                                              | 7230                                                             |
| <b>Independent reflections</b>                                            | 3890 [ $R_{\text{int}} = 0.0801$ , $R_{\text{sigma}} = 0.0622$ ] |
| <b>Data/restraints/parameters</b>                                         | 3890/0/361                                                       |
| <b>Goodness-of-fit on F<sup>2</sup></b>                                   | 1.070                                                            |
| <b>Final R indexes [<math>I \geq 2\sigma(I)</math>]</b>                   | $R_1 = 0.0901$ , $wR_2 = 0.2456$                                 |
| <b>Final R indexes [all data]</b>                                         | $R_1 = 0.1138$ , $wR_2 = 0.2670$                                 |
| <b>Largest diff. peak/hole / e Å<sup>-3</sup></b>                         | 0.40/-0.40                                                       |

**Table S4.** Crystal data and structure refinement for 3Fmp.

| <b>Identification code</b> | <b>3Fmp</b>             |
|----------------------------|-------------------------|
| <b>Empirical formula</b>   | $C_{33}H_{19}F_3N_2O_2$ |
| <b>Formula weight</b>      | 532.50                  |
| <b>Temperature/K</b>       | 150.00(10)              |
| <b>Crystal system</b>      | monoclinic              |
| <b>Space group</b>         | $P2_1/c$                |



|                                                         |                                                                |
|---------------------------------------------------------|----------------------------------------------------------------|
| <b>a/Å</b>                                              | 9.9603(2)                                                      |
| <b>b/Å</b>                                              | 7.8995(2)                                                      |
| <b>c/Å</b>                                              | 32.1373(6)                                                     |
| <b><math>\alpha</math>/°</b>                            | 90                                                             |
| <b><math>\beta</math>/°</b>                             | 93.108(2)                                                      |
| <b><math>\gamma</math>/°</b>                            | 90                                                             |
| <b>Volume/Å<sup>3</sup></b>                             | 2524.89(9)                                                     |
| <b>Z</b>                                                | 4                                                              |
| <b><math>\rho_{\text{calc}}/\text{cm}^3</math></b>      | 1.401                                                          |
| <b><math>\mu/\text{mm}^{-1}</math></b>                  | 0.860                                                          |
| <b>F(000)</b>                                           | 1096.0                                                         |
| <b>Crystal size/mm<sup>3</sup></b>                      | 1.800 × 0.090 × 0.050                                          |
| <b>Radiation</b>                                        | CuK $\alpha$ ( $\lambda$ = 1.54184)                            |
| <b>2<math>\Theta</math> range for data collection/°</b> | 8.892 to 134.224                                               |
| <b>Index ranges</b>                                     | -11 ≤ h ≤ 11, -6 ≤ k ≤ 9, -37 ≤ l ≤ 33                         |
| <b>Reflections collected</b>                            | 7581                                                           |
| <b>Independent reflections</b>                          | 4312 [ $R_{\text{int}}$ = 0.0396, $R_{\text{sigma}}$ = 0.0406] |
| <b>Data/restraints/parameters</b>                       | 4312/0/361                                                     |
| <b>Goodness-of-fit on F<sup>2</sup></b>                 | 1.046                                                          |
| <b>Final R indexes [<math>I \geq 2\sigma(I)</math>]</b> | $R_1$ = 0.0418, $wR_2$ = 0.1035                                |
| <b>Final R indexes [all data]</b>                       | $R_1$ = 0.0499, $wR_2$ = 0.1099                                |

**Table S5.** Translation of electronic energy levels obtained from the single-crystal studies of three compounds.

| <b>Structur</b> | <b>HOMO</b> | <b>LUMO</b> | <b><math>\Delta E_g</math></b> | <b>Dipole</b> | <b>T<sub>1</sub></b> | <b>S<sub>1</sub></b> | <b><math>\Delta E_{ST}</math></b> |
|-----------------|-------------|-------------|--------------------------------|---------------|----------------------|----------------------|-----------------------------------|
| <b>e</b>        | <b>(eV)</b> | <b>(eV)</b> | <b>(eV)</b>                    |               | <b>(eV)</b>          | <b>(eV)</b>          | <b>(eV)</b>                       |
| <b>3Fmo</b>     | -5.85       | -2.76       | 3.09                           | 7.77          | 2.54                 | 2.57                 | 0.03                              |
| <b>3Fmm</b>     | -5.81       | -2.65       | 3.16                           | 5.93          | 2.70                 | 2.78                 | 0.08                              |
| <b>3Fmp</b>     | -5.84       | -2.92       | 2.92                           | 6.07          | 2.41                 | 2.59                 | 0.18                              |
